# Supplementary material
Source: PubMed Central journal article supplement (PMC5380537)

Supplementary Figure 1.

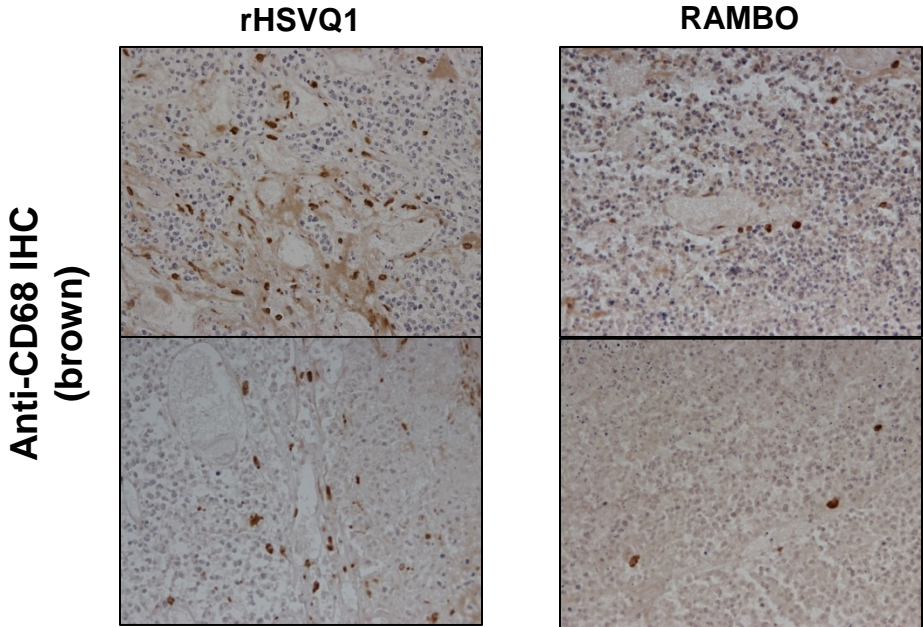

Supplement: NIHMS829457-supplement-2.pdf [file NIHMS829457-supplement-2.pdf]
